# Supplementary material for: Secukinumab is Efficacious and Safe in Hispanic Patients with Moderate-to-Severe Plaque Psoriasis: Pooled Analysis of Four Phase 3 Trials
Source: Springer Nature journal article supplement (doi:10.1007/s12325-017-0521-z), 2017-04-10
Supplement: MOESM1 [file 12212738]

**Title:** Secukinumab is efficacious and safe in Hispanic patients with moderate-to-severe plaque psoriasis: Pooled analysis of four phase 3 trials

*American Journal of Clinical Dermatology*

**Authors:** Sandra Adsit, MD,<sup>1</sup> Enrique Rivas Zaldivar, MD,<sup>2</sup> Howard Sofen, MD,<sup>3</sup> Ignacio Deic-Cas, MD,<sup>4</sup> César Maldonado García, MD,<sup>5</sup> Elkin O. Peñaranda, MD,<sup>6</sup> Luís Puig, MD,<sup>7</sup> Xiangyi Meng, PhD,<sup>8</sup> Todd Fox, PharmD, ACPR,<sup>9</sup> Adriana Guana, MD<sup>8</sup>

**Affiliations:** <sup>1</sup>*TCR Medical Corporation, San Diego, CA, United States;* <sup>2</sup>*Dermos, Guatemala City, Guatemala;* <sup>3</sup>*UCLA School of Medicine, Los Angeles, CA, United States;* <sup>4</sup>*Halitus, Buenos Aires, Argentina;* <sup>5</sup>*Centro Dermatológico “Dr. Ladislao de la Pascua,” Mexico City, Mexico;* <sup>6</sup>*Riesgo de Fractura S.A, Bogota, Colombia;* <sup>7</sup>*Hospital de la Santa Creu i Sant Pau, Universitat Autònoma de Barcelona, Barcelona, Spain;* <sup>8</sup>*Novartis Pharmaceuticals Corporation, East Hanover, NJ, United States;* <sup>9</sup>*Novartis Pharma AG, Basel, Switzerland*

**Corresponding author:** Sandra Adsit, MD

TCR Medical Corporation

9025 Balboa Ave, San Diego, CA 92123

Telephone: 1-858-571-6800

Email: [sadsit@therapeuticsinc.com](mailto:sadsit@therapeuticsinc.com)

**Supplemental Table 1.** Number of Hispanic and non-Hispanic Patients by Country

| <b>Country</b> | <b><i>Hispanic Patients</i></b> | <b><i>Non-Hispanic Patients</i></b> |
|----------------|---------------------------------|-------------------------------------|
| Argentina      | 46                              | 3                                   |
| Australia      | 0                               | 35                                  |
| Belgium        | 1                               | 15                                  |
| Canada         | 2                               | 120                                 |
| Colombia       | 25                              | 0                                   |
| Egypt          | 0                               | 18                                  |
| Estonia        | 0                               | 80                                  |
| Finland        | 0                               | 7                                   |
| France         | 23                              | 64                                  |
| Germany        | 2                               | 301                                 |
| Guatemala      | 62                              | 0                                   |
| Hungary        | 0                               | 37                                  |
| Iceland        | 0                               | 60                                  |
| India          | 2                               | 104                                 |
| Israel         | 0                               | 11                                  |
| Italy          | 1                               | 14                                  |
| Japan          | 0                               | 58                                  |
| Latvia         | 0                               | 28                                  |
| Lithuania      | 0                               | 16                                  |
| Mexico         | 11                              | 0                                   |
| Philippines    | 0                               | 22                                  |

|                |    |     |
|----------------|----|-----|
| Poland         | 0  | 73  |
| Romania        | 0  | 12  |
| Singapore      | 0  | 8   |
| Spain          | 15 | 2   |
| South Korea    | 0  | 61  |
| Sweden         | 0  | 9   |
| Taiwan         | 0  | 36  |
| United Kingdom | 1  | 23  |
| United States  | 46 | 255 |
